**$^1\text{H}$ ,  $^{13}\text{C}$  and  $^{15}\text{N}$  resonance assignment of the SARS-CoV-2 full-length nsp1 protein and its mutants reveals its unique secondary structure features in solution.**

Tatiana Agback<sup>1</sup>, Francisco Dominguez<sup>2</sup>, Ilya Frolov<sup>2</sup>, Elena I. Frolova<sup>2</sup>, Peter Agback<sup>1</sup> \*

<sup>1</sup> Department of Molecular Sciences, Swedish University of Agricultural Sciences, PO Box 7015, SE-750 07 Uppsala, Sweden.

<sup>2</sup>Department of Microbiology, University of Alabama at Birmingham, AL, USA.

\* Corresponding author: Correspondence and requests for assignment should be addressed to P.A(email: [peter.agback@slu.se](mailto:peter.agback@slu.se))

1 **Abstract**

2

3           Structural characterization of the SARS-CoV-2 full length nsp1 protein will be an essential tool  
4 for developing new target-directed antiviral drugs against SARS-CoV-2 and for further understanding  
5 of intra- and intermolecular interactions of this protein. As a first step in the NMR studies of the protein,  
6 we report the  $^1\text{H}$ ,  $^{13}\text{C}$  and  $^{15}\text{N}$  resonance backbone assignment as well as the  $\text{C}\beta$  of the apo form of the  
7 full-length SARS-CoV-2 nsp1 including folded domain together with the flanking N- and C- terminal  
8 intrinsically disordered fragments. The 19.8 kD protein was characterized by high-resolution NMR.  
9 Validation of assignment have been done by using two different mutants, H81P and K129E/D48E as  
10 well as by amino acid specific experiments. According to the obtained assignment, the secondary  
11 structure of the folded domain in solution was almost identical to its previously published X-ray  
12 structure, but some discrepancies have been detected. In the solution SARS-CoV-2 nsp1 exhibited  
13 disordered, flexible N- and C-termini with different dynamic characteristics. The short peptide in the  
14 beginning of the disordered C-terminal domain adopted two different conformations distinguishable on  
15 the NMR time scale. We propose that the disordered and folded nsp1 domains are not fully independent  
16 units but are rather involved in intramolecular interactions. Studies of the structure and dynamics of the  
17 SARS-CoV-2 mutant in solution are on-going and will provide important insights into the molecular  
18 mechanisms underlying these interactions.

19

20

21

## 22 **Introduction**

23           Within the recent 1.5 years, the Severe Acute Respiratory Syndrome coronavirus 2 (SARS-  
24 CoV-2) has spread all over the world and devastated the economies of essentially all countries (1, 2). To  
25 date, more than one hundred million people have contracted the disease that led more than 3 M deaths  
26 (<https://www.worldometers.info/coronavirus>). Despite the enormous public health threat of this and  
27 previous CoV infections, no efficient therapeutic means have been developed against coronaviruses  
28 (CoV) before the COVID-19 pandemics. One of the major reasons for this was a lack of detailed  
29 knowledge of the mechanism of CoV replication and interaction with host cells.

30           SARS-CoV-2 is a member of the *Betacoronavirus* ( $\beta$ -CoV) genus along with other highly  
31 pathogenic respiratory viruses, such as SARS-CoV-1 and MERS-CoV (Middle Eastern respiratory  
32 syndrome virus). These viruses have similar genome and replication strategies but differ in their  
33 pathogenicity for humans. Similar to other  $\beta$ -CoVs, the SARS-CoV-2 genome (G RNA) is represented  
34 by a single-stranded RNA of positive polarity of ~30 kb in length (3-5). It mimics the structure of cellular  
35 mRNAs in that it has a Cap and a poly(A)-tail at the 5' and 3' termini, respectively. Upon delivery into  
36 the cells, the G RNA is directly translated into two very long polyproteins, which are encoded by the  
37 overlapping ORF1a and ORF1b. The latter polyproteins are enzymatically processed into individual  
38 nonstructural proteins nsp1-to-16 by the encoded protease activities. These nsps represent viral  
39 components of the replication complexes and are also involved in modification of the intracellular  
40 environment to promote efficient viral replication. As in the case of other  $\beta$ -CoVs, the SARS-CoV-2-  
41 specific nsp1 protein plays indispensable roles in these processes (6-8). First of all, it is a key player in  
42 downregulation of cellular translation and is a major  $\beta$ -CoV-specific virulence factor (6, 9, 10). It  
43 interacts with the 40S ribosomal subunit, blocks the RNA channel and inhibits initiation of translation  
44 of cellular, but not viral, RNA templates (6, 8, 11-17). SARS-CoV-1 and MERS nsp1 proteins are also  
45 indirectly involved in endonuclease degradation of cellular mRNAs; however, the mechanism of this  
46 function remains to be determined (18, 19). It is still unknown whether SARS-CoV-2 nsp1 can mediate

47 degradation of cellular RNAs. Nsp1 of both SARS-CoV-1 and SARS-CoV-2 were also implicated in  
48 inhibition of nuclear-cytoplasmic traffic, albeit by different mechanisms (20, 21). The above activities  
49 appear to play critical roles in the downregulation of the innate immune response that can mount during  
50 SARS-CoV-2 infection, and thus, control the infection spread. Nsp1 proteins of  $\beta$ -CoVs also facilitate  
51 cell cycle arrest, which is clearly detectable during viral infection and nsp1 expression (9, 22).  
52 Importantly, the previous studies demonstrated that the deletion of nsp1 gene in the genome of other  $\beta$ -  
53 CoVs makes them nonviable (23). This strongly indicated the direct involvement of the latter protein in  
54 genomic RNA replication and/or synthesis of the subgenomic RNAs, which encode viral structural and  
55 accessory proteins. Interestingly, point mutations or small deletions in nsp1 can independently prevent  
56 either inhibition of cellular translation or viral replication (22-27).

57 Thus, the accumulated data suggest that nsp1 plays important roles in CoV replication and  
58 pathogenesis. It exhibits multiple activities and likely interacts with a variety of viral and cellular  
59 proteins and organelles. Understanding of the molecular mechanisms of these interactions is critical for  
60 development of live attenuated vaccines and therapeutic means against SARS-CoV-2 infection. Further  
61 dissection of multiple nsp1 functions in viral replication and pathogenesis requires the detailed  
62 knowledge of the dynamic structure of nsp1. To date, the data about the structure of  $\beta$ -CoV nsp1 remain  
63 very fragmented. This is a relatively small 19.8 kDa protein. It contains an N-terminal structured domain  
64 (~aa 10 to 124 in SARS-CoV2 nsp1), which was proposed to be critical for degradation of cellular  
65 mRNAs. The first 10 aa and the C-terminal fragment (aa125-180) in SARS-Cov-2 nsp1 are predicted to  
66 be intrinsically disordered. However, the last 26-aa-long peptide in this C-terminal fragment has been  
67 shown to fold into two short  $\alpha$ -helixes upon binding to 40S ribosome subunit (7, 8, 17). The structure of  
68 folded N-terminal domain of SARS-CoV nsp1 has been determined by NMR (PDB:2HSX), and two X-  
69 ray structures of the folded domain of SARS-CoV-2 nsp1 have been recently published (PDB:7K7P and  
70 7K3N) (28-30). The N-terminal nsp1 domains of both viruses have similar folds. The important  
71 difference was found to be the presence of an additional small  $\beta$ -strand (aa 95-97) in SARS-CoV-2-

72 specific nsp1. No structure of the full-length proteins containing the disordered C-terminal domain is  
73 available for the nsp1 of any  $\beta$ -CoV nsp1.

74         The flexibility of the disordered C- and N-terminal fragments in the SARS-CoV-2 nsp1 and  
75 their interactions with the folded domain may play the critical role(s) in protein functions. Solution NMR  
76 is the method of choice for studying such flexible regions in proteins. Most of the currently available  
77 NMR approaches and protocols are focused on elucidating the structure of either fully folded proteins  
78 (FP), which complement the crystallographic data, or the intrinsically disordered protein (IDPs).  
79 Complete backbone and side chain resonance assignment of NMR spectra of large proteins, containing  
80 both folded and disordered domains, is still a challenge due to (a) a high degree of divergence in the  
81 conformational flexibility characteristics of disordered and folded domains and (b) the reduced  
82 frequency dispersion observed in the NMR spectra in the  $^1\text{H}$  dimension for disordered regions. Recently,  
83 a near-complete backbone resonance assignment of the SARS-CoV-2 nsp1 was reported (31). The latter  
84 protein was analysed in an acidic buffer, pH 6.5.

85         As a first step towards characterizing the structure and dynamics of the full-length SARS-CoV-  
86 2 nsp1 in neutral buffer by NMR spectroscopy, we herein report the almost complete  $^1\text{H}$ ,  $^{13}\text{C}$  and  $^{15}\text{N}$   
87 backbone and  $^{13}\text{C}\beta$  side chain assignment of the wild type protein and two of its mutants: a single mutant  
88 H81P and a double mutant K129E, D48E. This assignment has been evaluated by additionally observing  
89 selectively chosen type of amino acids (MUSIC-type of experiments). To overcome ambiguities in  
90 assignment in the crowded areas of the full-length SARS-CoV-2 nsp1 spectra, we additionally compared  
91 the assigned resonances with those corresponding to the single and double mutants of nsp1. Based on  
92 this data, the secondary structure of the full-length SARS-CoV-2 nsp1 in solution was derived and,  
93 additionally, the protein flexibility was evaluated. These data provide a structural basis for further  
94 understanding of intra- and intermolecular interactions of the SARS-CoV-2 nsp1.

## 95 **Material and Methods**

96 **Preparation of  $^{15}\text{N}$ ,  $^{13}\text{C}$  labeled SARS-CoV-2 nsp1 proteins.** Nucleotide sequence of full length wt

97 nsp1 was amplified by PCR from recombinant cDNA of SARS-CoV-2 Wuhan-Hu-1 strain  
98 (NC\_045512.2) using primers:

99 NSP1-Dir CCACTGGTCTCAAGGTGGTATGGAGAGCCTTGTCCTGG

100 NSP1-Rev CCACACTCGAGTTATTACCCTCCGTTAAGCTCACGC.

101 The PCR product was cloned into pE-SUMOpro-3 plasmid (LifeSensors Inc) between Bsa I and Xho I  
102 restriction sites. The synthetic gene blocks encoding mutant nsp1 were ordered from Integrated DNA  
103 Technologies and cloned into pE-SUMOpro-3 plasmid (LifeSensors Inc) between Eco RI and Xho I  
104 restriction sites. Plasmids encoding SUMO-nsp1 proteins were transformed into *E. coli* strain  
105 Rosetta2(DE3)pLacI (Novagen), and proteins were produced in the M9 media supplemented with 2 g/L  
106 [<sup>15</sup>N]NH<sub>4</sub>Cl (Cambridge Isotope Laboratories) and 3 g/L d-[<sup>13</sup>C<sub>6</sub>]glucose (Cambridge Isotope  
107 Laboratories). The expression was induced by 1 mM IPTG after cells reached the density of ~2 OD<sub>600</sub>.  
108 Then cells continued to grow at 37°C for 3-5 h. Freshly prepared or frozen cell pellets were lysed in  
109 Emulsiflex B15 (Avestin). The lysates were loaded on HisTrap HP column (GE Healthcare) and after  
110 extensive washing the recombinant proteins were eluted by imidazole gradient. Fractions containing  
111 SUMO-HVD nsp1 proteins were combined, and His-SUMO tag was cleaved with Upl1 protease. After  
112 cleavage, the proteins were diluted to contain 25 mM NaCl and further purified on Resource Q column  
113 (GE Healthcare). Size exclusion chromatography on a HiLoad Superdex 75 16/600 column (GE  
114 Healthcare) in NMR buffer was used as a final purification step. Fractions containing pure proteins were  
115 combined and concentrated.

116 The protein purities and identities were confirmed by SDS-PAGE and mass spectrometry (for  
117 unlabeled protein), respectively. Final proteins contained extra glycine at the N-terminus, which was  
118 required for SUMO cleavage. Protein concentrations were determined on 280 nm using extinction  
119 coefficients, which were determined by ProteinCalculator v3.4 (<http://protcalc.sourceforge.net/>).

120

## 121 **NMR samples preparation**

122 All NMR experiments were performed in a buffer containing 20 mM HEPES pH 7.5, 100 mM  
123 KCl (with or without 2.5 mM MgCl<sub>2</sub>), 1 mM NaN<sub>3</sub>, 10 (v/v) % D<sub>2</sub>O and 0.1 mM DSS (4,4-dimethyl-  
124 4-silapentane-1-sulfonic acid) as an internal <sup>1</sup>H chemical shift standard. The protein concentration were  
125 about 0.4 mM and spectra were acquired in a 5 mm tube (final volume of 0.45mL). <sup>13</sup>C and <sup>15</sup>N  
126 chemical shifts were referenced indirectly to the <sup>1</sup>H standard using a conversion factor derived from  
127 the ratio of NMR frequencies(32).

128 To perform 3D <sup>13</sup>C-HSQC type experiments, the nsp1 sample was lyophilized and dissolved  
129 in D<sub>2</sub>O in a volume of 0.45 mL. To confirm that the protein's structure was not affected by  
130 lyophilization, sample was lyophilized again, dissolved in H<sub>2</sub>O and 1D <sup>1</sup>H spectrum was compared to  
131 the original spectrum.

## 132 **NMR experiments**

133  
134 NMR experiments were acquired on Bruker Avance III spectrometers operating at 14.1 T,  
135 equipped with a cryo-enhanced QCI-P probe. The assignment of the backbone and side chains  
136 resonances was based on a set of 3D TROSY or HSQC triple resonance experiments from the Bruker  
137 library. The summary of the performed experiments and the key parameters are presented in Table 1.  
138 To increase resolution in the indirect dimensions and reduce acquisition time of the 3D experiments,  
139 the iterative non-uniform sampling protocol (NUS) (33) comprised TROSY-HNCO, TROSY-HNCA  
140 and TROSY-HN(CO)CA, TROSY-HN(CA)CO, TROSY-HN(CO)CACB, TROSY HNCACB,  
141 H(CC)(CO)NH, DIPS12- <sup>15</sup>N HSQC, HCACO and MLEV17-<sup>13</sup>C HSQC experiments. NUS points  
142 sampling schedule applied to 3D experiments are listed in Table 1.

143 To assign H $\alpha$  proton resonances, additional <sup>1</sup>H-<sup>15</sup>N-NOESY, <sup>1</sup>H-<sup>13</sup>C- NOESY (34-36) data  
144 were collected.

145 To verify assignment of the aa located in the disordered fragment of SARS-CoV-2 nsp1,  $^{13}\text{C}$   
146 observed CON experiment with IPAP scheme for virtual decoupling (37, 38) was used to correlate  $^{15}\text{N}$   
147 with  $^{13}\text{C}'$  resonances.

148 We also performed TROSY type MUSIC experiments with semi-constant time acquisition  
149 period in the indirect dimension to identify different type of aa such as Ser, Glu, Ala, Asp, Gln, Asn  
150 and their respective n+1 residues. Key parameters of the experiments used in this study are presented  
151 in Table 1. All TROSY-type MUSIC pulse sequences and the setting details have been fully described  
152 by elsewhere (39).

153 Due to the differences in the relaxation characteristics of the folded domain and the disordered  
154 fragments of SARS-CoV-2 nsp1, several experiments were performed at two temperatures: 298 K and  
155 308 K.

156 Data were processed by Topspin 4.0.6 (Bruker) and assigned using CcpNmr Analysis 2.4.2  
157 (40).

158 The chemical shifts of the full-length SARS-CoV-2 nsp1 were analyzed with TALOS+  
159 software (41). As input for TALOS+ analysis, the experimentally derived chemical shifts of  $^1\text{HN}$ ,  $^{15}\text{N}$ ,  
160  $^{13}\text{C}\alpha$ ,  $^{13}\text{C}\beta$ ,  $^{13}\text{C}'$  and  $^1\text{H}\alpha$  nuclei for every aa were used. In case of absence of the chemical shifts,  
161 TALOS+ uses a database of sequences to predict the secondary structure (41).

162 The secondary X-ray based structures were extracted with the UCSF Chimera program(42)  
163 using the PDB entry: 7K7P (30).

164 In the text and figures, the standard nomenclature for amino acids of the carbon atoms was used, where  
165  $^{13}\text{C}\alpha$  is the carbon next to the carbonyl group  $^{13}\text{C}'$  and  $^{13}\text{C}\beta$  is the carbon next to  $^{13}\text{C}\alpha$  (43).

## 166 **Result and discussion**

### 167 *Assignment protocol.*

168 The validity of the secondary structure analysis based on chemical shifts (CS) depends on the knowledge  
169 of CS of the  $^1\text{HN}$ ,  $^{15}\text{N}$ ,  $^{13}\text{C}\alpha$ ,  $^{13}\text{C}\beta$ ,  $^{13}\text{C}'$  nuclei but also on  $^1\text{H}\alpha$  assigned resonances. Thus, we used the



170 fully protonated  $^{15}\text{N}$ ,  $^{13}\text{C}$ -labelled SARS-CoV-2 nsp1. Additionally, this provides a foundation for  
 171 validating inter  $\beta$ -strands interactions in the folded domain of the protein through observation of nOe  
 172 contacts between  $^1\text{HN}$ - $^1\text{HN}$  or  $\text{H}^\alpha$  -  $^1\text{HN}$  protons (44). Recently, it was reported (31) that the secondary  
 173 structure of the full-length SARS-CoV-2 nsp1 protein (Fig.1A) at pH 6.5 embraces one folded domain  
 174 (aa 14-125) and two disordered chains, flanking the folded domain at the N-terminus (aa 1-13) and the  
 175 C-terminus (aa 126-180). It is known that folded and intrinsically disordered proteins (IDP) entities,  
 176 have differences in relaxation properties and, thus, require different optimal NMR experimental  
 177 conditions. This also means that the positions of the amide  $^1\text{H}$  and  $^{15}\text{N}$  chemical shifts of the disordered  
 178 fragments and some flexible parts of the folded domains strongly depend on the buffer conditions  
 179 including pH and temperature. Keeping this in mind, we performed all NMR data collections at two  
 180 temperature, 298 K and 308 K. Consequently, we achieved the maximum NMR performances for the  
 181 folded domain at 308 K and for the disordered fragments at 298 K. We also performed all assignments  
 182 at physiological buffer (pH 7.5), low salt, and in the absence or presence of 2.5 mM  $\text{MgCl}_2$ . These  
 183 conditions are optimal for future analysis of nsp1 interaction with 40S ribosome or RNA.

184 As there are no programs readily available for performing automatic assignment of a protein  
 185 containing both folded and disordered regions, we use the conventional manual assignment strategy  
 186 based on experiments presented in Table 1. To achieve the best resolution in the 3D experiments in the  
 187 indirect dimensions and to resolve resonances corresponding to the disordered part of protein, NMR  
 188 experiments were mostly performed with the NUS option (33).

189 **Table 1. List of NMR experiments and the main parameters used to perform the**  
 190 **sequence specific assignment of the backbone and sidechains of the full-length**  
 191 **SARS-CoV-2 nsp1 protein.**

| Experiments                                        | Maximum evolution time, ms.           |                                          |                                         | Number scans | NUS, points | NUS, %    |
|----------------------------------------------------|---------------------------------------|------------------------------------------|-----------------------------------------|--------------|-------------|-----------|
|                                                    | F3                                    | F2                                       | F1                                      |              |             |           |
| $^1\text{H}$ - $^{15}\text{N}$ HSQC <sup>(a)</sup> | <b>106.5(<math>^1\text{H}</math>)</b> | <b>164.4(<math>^{15}\text{N}</math>)</b> | -                                       | <b>8</b>     | -           | -         |
| TROSY-HNCO <sup>(a)</sup>                          | <b>106.5(<math>^1\text{H}</math>)</b> | <b>12.3(<math>^{15}\text{N}</math>)</b>  | <b>33.1(<math>^{13}\text{C}</math>)</b> | <b>4</b>     | <b>900</b>  | <b>30</b> |
| TROSY-HN(CA)CO <sup>(a)</sup>                      | <b>106.5(<math>^1\text{H}</math>)</b> | <b>12.3(<math>^{15}\text{N}</math>)</b>  | <b>21.2(<math>^{13}\text{C}</math>)</b> | <b>32</b>    | <b>576</b>  | <b>30</b> |
| TROSY-HNCA <sup>(a)</sup>                          | <b>106.5(<math>^1\text{H}</math>)</b> | <b>12.3(<math>^{15}\text{N}</math>)</b>  | <b>16.5(<math>^{13}\text{C}</math>)</b> | <b>8</b>     | <b>900</b>  | <b>30</b> |

|                                                         |                             |                              |                             |            |             |           |
|---------------------------------------------------------|-----------------------------|------------------------------|-----------------------------|------------|-------------|-----------|
| TROSY-HN(CO)CA <sup>(a)</sup>                           | <b>106.5(<sup>1</sup>H)</b> | <b>12.3(<sup>15</sup>N)</b>  | <b>16.5(<sup>13</sup>C)</b> | <b>8</b>   | <b>900</b>  | <b>30</b> |
| TROSY-HNCACB <sup>(a)</sup>                             | <b>106.5(<sup>1</sup>H)</b> | <b>10.2(<sup>15</sup>N)</b>  | <b>8.3(<sup>13</sup>C)</b>  | <b>32</b>  | <b>750</b>  | <b>30</b> |
| TROSY-HN(CO)CACB <sup>(a)</sup>                         | <b>106.5(<sup>1</sup>H)</b> | <b>10.2(<sup>15</sup>N)</b>  | <b>12.4(<sup>13</sup>C)</b> | <b>32</b>  | <b>1125</b> | <b>30</b> |
| 3D H(CC)(CO)NH                                          | <b>106.5(<sup>1</sup>H)</b> | <b>10.7(<sup>15</sup>N)</b>  | <b>3.3(<sup>1</sup>H)</b>   | <b>16</b>  | <b>208</b>  | <b>25</b> |
| 3D <sup>1</sup> H- <sup>15</sup> N NOESY <sup>(a)</sup> | <b>106.5(<sup>1</sup>H)</b> | <b>12.3(<sup>15</sup>N)</b>  | <b>6.6(<sup>1</sup>H)</b>   | <b>16</b>  | -           | -         |
| 3D DIPSII2- <sup>15</sup> N HSQC                        | <b>106.5(<sup>1</sup>H)</b> | <b>13.1(<sup>15</sup>N)</b>  | <b>9.8(<sup>1</sup>H)</b>   | <b>16</b>  | <b>902</b>  | <b>30</b> |
| 3D <sup>1</sup> H- <sup>13</sup> C NOESY <sup>(b)</sup> | <b>155.1(<sup>1</sup>H)</b> | <b>3.3(<sup>13</sup>C)</b>   | <b>15.1(<sup>1</sup>H)</b>  | <b>8</b>   | -           | -         |
| 3D HCACO <sup>(b)</sup>                                 | <b>426.5(<sup>1</sup>H)</b> | <b>9.9(<sup>13</sup>C)</b>   | <b>19.8(<sup>13</sup>C)</b> | <b>8</b>   | <b>900</b>  | <b>25</b> |
| 3D MLEV17- <sup>13</sup> C HSQC <sup>(b)</sup>          | <b>155.1(<sup>1</sup>H)</b> | <b>7.4(<sup>13</sup>C)</b>   | <b>15.1(<sup>1</sup>H)</b>  | <b>8</b>   | <b>2250</b> | <b>25</b> |
| 2D CON IPAP                                             | -                           | <b>169.6(<sup>13</sup>C)</b> | <b>22.4(<sup>15</sup>N)</b> | <b>32</b>  | -           | -         |
| TROSY-MUSIC <sup>(c)</sup> (Ser+1)                      | <b>106.5(<sup>1</sup>H)</b> | <b>16.4(<sup>15</sup>N)</b>  | -                           | <b>64</b>  | -           | -         |
| TROSY-MUSIC <sup>(c)</sup> (Ser+1, Ser)                 | <b>106.5(<sup>1</sup>H)</b> | <b>16.4(<sup>15</sup>N)</b>  | -                           | <b>64</b>  | -           | -         |
| TROSY-MUSIC <sup>(c)</sup> (Glu+1)                      | <b>106.5(<sup>1</sup>H)</b> | <b>16.4(<sup>15</sup>N)</b>  | -                           | <b>128</b> | -           | -         |
| TROSY-MUSIC <sup>(c)</sup> (Glu+1, Glu)                 | <b>106.5(<sup>1</sup>H)</b> | <b>16.4(<sup>15</sup>N)</b>  | -                           | <b>128</b> | -           | -         |
| TROSY-MUSIC <sup>(c)</sup> (Ala+1)                      | <b>106.5(<sup>1</sup>H)</b> | <b>16.4(<sup>15</sup>N)</b>  | -                           | <b>128</b> | -           | -         |
| TROSY-MUSIC <sup>(c)</sup> (Ala+1, Ala)                 | <b>106.5(<sup>1</sup>H)</b> | <b>16.4(<sup>15</sup>N)</b>  | -                           | <b>128</b> | -           | -         |
| TROSY-MUSIC <sup>(c)</sup> (Asp+1)                      | <b>106.5(<sup>1</sup>H)</b> | <b>16.4(<sup>15</sup>N)</b>  | -                           | <b>64</b>  | -           | -         |
| TROSY-MUSIC <sup>(c)</sup> (Asp+1, Asp)                 | <b>106.5(<sup>1</sup>H)</b> | <b>16.4(<sup>15</sup>N)</b>  | -                           | <b>64</b>  | -           | -         |
| TROSY-MUSIC <sup>(c)</sup> (Asn+1, Gln+1)               | <b>106.5(<sup>1</sup>H)</b> | <b>16.4(<sup>15</sup>N)</b>  | -                           | <b>128</b> | -           | -         |
| TROSY-MUSIC <sup>(c)</sup> (Asn+1)                      | <b>106.5(<sup>1</sup>H)</b> | <b>16.4(<sup>15</sup>N)</b>  | -                           | <b>128</b> | -           | -         |

- 192       <sup>(a)</sup> Experiments were performed at two temperatures: T=298 K and 308 K  
 193       <sup>(b)</sup> Experiments were performed on sample in D<sub>2</sub>O.  
 194       <sup>(c)</sup> Parameters and pulse sequences of the TROSY type MUSIC with semi constant time in  
 195       indirect dimension described by us in (39).  
 196

197       To facilitate the assignment procedure in this study, we chose the following strategy. First,  
 198       selective type TROSY- MUSIC experiments on full length wild type <sup>15</sup>N,<sup>13</sup>C labelled SARS-CoV-2  
 199       nsp1 at 308 K were performed. Fig.1 presents the superposition of the <sup>1</sup>H-<sup>15</sup>N HSQC of SARS-CoV-2  
 200       nsp1 protein (shown in grey) with TROSY-MUSIC spectra of selected D + 1, D, E + 1, A + 1, A, S + 1  
 201       and S cross peaks of aa. As we have described earlier(39), this type of experiments mostly benefits  
 202       analysis of IDPs.

203       **Fig 1. <sup>1</sup>H-<sup>15</sup>N HSQC spectra at T=308K of the full-length SARS-CoV-2 nsp1 protein with**  
 204       **TROSY MUSIC experiments.**

205 Superpositions of the  $^1\text{H}$ - $^{15}\text{N}$  HSQC spectra at  $T=308\text{K}$  of the full-length SARS-CoV-2 nsp1 protein  
206 (grey) with TROSY MUSIC experiments performed at 308 K. (a) (blue) D + 1 and D (red) cross peaks;  
207 (b) (blue) E + 1 and E (red) cross peaks; (c) (blue) A + 1 and A (red) cross peaks; (d) (blue) S + 1 and  
208 S (red) cross peaks. The assignment of the observed cross peaks was done according to the aa sequence,  
209 which is shown in Fig.2A.

210  
211 Indeed, spectra of the TROSY-MUSIC presented in Fig. 1 (a) and (b) show that all D + 1, D, E + 1, E  
212 cross peaks corresponding to the disordered fragments, but not for the folded domain, of SARS-CoV-2  
213 nsp1 protein were observed and allowed their discrimination. TROSY-MUSIC with A + 1, A, S + 1  
214 selection were showed almost all expected correlations for their respective types of aa in the sequence  
215 through the full length of the nsp1 protein. The exception was the amide protons that are involved in a  
216 slow conformational exchange, and thus, their cross peaks in  $^1\text{H}$ - $^{15}\text{N}$  HSQC spectrum were broadened  
217 below the detection limit.

218 These data were used to assign the resonances at 308 K. The  $^1\text{H}$ - $^{15}\text{N}$ -HSQC spectrum at  
219 308K shows well-dispersed and narrow-line widths of the amide signals (Fig. 2 B, C). At this  
220 temperature, we have observed and assigned 158 aa, including prolines. Importantly, even at this  
221 higher temperature (308K), amino acids 125K, 124R, 123L and 122L shows two sets of amides  $^1\text{HN}$  -  
222  $^{15}\text{N}$  cross peaks, which allowed us to conclude that the aa between the folded domain and the C-  
223 terminal disordered part of SARS-CoV-2 nsp1 protein adopt two distinguishable conformations  
224 detectable in the NMR time scale.

225 **Fig 2.  $^1\text{H}$ - $^{15}\text{N}$  HSQC spectra at  $T=308\text{K}$  of the full-length SARS-CoV-2 nsp1 protein**  
226 **with assignments.**

227 (A) Amino acid sequence of the full-length SARS-CoV-2 nsp1 protein. The folded domain is indicated  
228 in blue. (B)  $^1\text{H}$ - $^{15}\text{N}$  HSQC spectrum at 308K with its extended crowded part (C) of the full-length  $^{15}\text{N}$ ,  
229  $^{13}\text{C}$ -labelled SARS-CoV-2 nsp1 protein at 0.4 mM concentration in the buffer containing 20 mM

230 HEPES pH 7.5, 100 mM KCl, 2.5 mM MgCl<sub>2</sub>, 1 mM TCEP, 1 mM NaN<sub>3</sub>, 10 (v/v) % D<sub>2</sub>O and 0.1  
231 mM DSS at 308 K. The chemical shift assignment of NH backbone is shown by the number and  
232 symbols corresponding to the sequence (A). The assignment is presented only for the aa, whose cross  
233 peaks were observed at T 308K.  
234

---

235 Next, we wanted to examine the broadening of some of the NH backbone resonances below  
236 the detection limit at 308K. To perform this analysis and additionally validate resonances ambiguously  
237 assigned due to its crowdedness in the spectra, we used NMR data of two SARS-CoV-2 nsp1 protein  
238 mutants. The selection of mutants was based on the following criteria: (1) the replacement of chosen  
239 aa should not lead to any strong conformational transition in the protein and (2) preferably large  
240 chemical shift perturbation (CSP) should be expected in the place of the exchanged aa. We have  
241 analysed NMR data of 2 mutants. In the first, a single histidine in position 81 was replaced by a  
242 proline (H81P). According to the X-ray structure (PDB: 7K7P), the aromatic ring of H81 is located in  
243 a flexible loop and turned towards the solvent. Thus, its replacement should not lead to any significant  
244 change in the architecture of the secondary structure of SARS-CoV-2 nsp1 protein. Moreover, the  
245 replacement by proline was expected to induce a large perturbation of chemical shifts (CS) of the  
246 nuclei located in its proximity due to its unique structure and possibly enhance the stability of the loop.  
247 As it is shown in Fig. 3d, the CSP observed in <sup>1</sup>H-<sup>15</sup>N HSQC spectra of wt nsp1 vs the H81P mutant  
248 (red bars) are evident. As expected, the most significant CSPs were observed between aa 75 and 85.  
249 Noteworthy, the aa of the N-termini (10-17) and at the beginning of the C-terminal disordered  
250 fragment (120-127aa) are affected as well. This finding led us to the conclusion that aa corresponding  
251 to those three regions are in close proximity.

252 **Fig 3. Secondary structure and order parameters of the full-length SARS-CoV-2 protein.**

253 (a) The secondary structure derived from the X-ray data of the folded domain of SARS-CoV-2 nsp1  
254 (10-124 aa, PDB: 7K7P) according to UCSF Chimera (42). The yellow lines show loop segments

255 of the protein. **(b)** Index of secondary structure prediction (S.S. Prediction) (*red* and *blue* bars  
256 indicate  $\alpha$ -helix and  $\beta$ -strands, respectively. **(c)** Model-free (45) order parameter,  $S^2$ , using random  
257 coil index (RCI)(46) extracted by TALOS+ (41). **(d)** Chemical shift deviations of  $\Delta^1\text{H}$  and  $\Delta^{15}\text{N}$   
258 nuclei (ppm), obtained as distances  $\sqrt{(\Delta^1\text{H})^2 + (0.15\Delta^{15}\text{N})^2}$ , between wild type SARS-CoV-2 nsp1  
259 protein and nsp1(H81P) mutant (red) or nsp1(K129E, D48E) mutant (blue). AAs, which did not  
260 contribute to the TALOS+ analysis are shown by short black bars in green box on top of panel **(b)**.  
261

262 In the second mutant, we introduced two aa substitutions: Lys in position 129 with positive charged side  
263 chain and Asp in position 48 with negative charged side chain were replaced by Asp with negative  
264 charged side chain (K129E and D48E). First mutation is in the beginning of the disordered region of  
265 SARS-CoV-2 nsp1. The second mutation, according to the X-ray structure (PDB: 7K7P), is located at  
266 the end of the  $\alpha$ -helix. In Fig. 3d, the CSPs observed in  $^1\text{H}$ - $^{15}\text{N}$  HSQC spectra of wt nsp1 vs the double  
267 mutant is presented by blue bars. The significant CSPs were observed for aa 44-51 and 125-132.

268 The strategy applied in this study of inducing the CSP of nuclei in local area of protein through  
269 deliberate mutation of aa structurally insensitive was very valuable and helped us to resolve some  
270 ambiguities in the backbone and side chain assignments. More detailed characterisation of the SARS-  
271 CoV-2 nsp1 mutants will be published elsewhere.

272 The resulting assignment of the full length of SARS-CoV-2 nsp1 was as following. For the  
273 folded domain (aa 14-125) we assigned 95%  $^1\text{HN}$  and 95%  $^{15}\text{N}$  including prolines, 96% of  $^{13}\text{C}\alpha$ , 88%  
274 of  $^{13}\text{C}\beta$ , 94% of  $^{13}\text{C}'$  and 83% of all  $\text{H}^\alpha$ . For the two disordered fragments (aa 1-13 and aa 126-180) we  
275 assigned 91%  $^1\text{HN}$ , 91%  $^{15}\text{N}$ , 94% of  $^{13}\text{C}\alpha$ , 93% of  $^{13}\text{C}\beta$ , 94% of  $^{13}\text{C}'$  and 76% of all  $\text{H}^\alpha$ .

276 Comparison of NMR spectra acquired in different conditions in this and published (31) work  
277 revealed only small changes for folded, dynamically stable nsp1 domain. However, the resonances  
278 corresponding to the loops and the disordered regions of the protein were strongly affected by changes  
279 in pH or temperature. All  $^1\text{H}$ ,  $^{15}\text{N}$  and  $^{13}\text{C}$  chemical shifts of the full-length of SARS-CoV-2 nsp1 protein

280 at pH 7.5 and at two temperatures, 298K and 308K, have been deposited in BioMagResBank  
281 (<http://www.bmrb.wisc.edu>) under the accession 50915. The assignment of the single mutant  
282 nsp1(H81P) and double mutant nsp1(K129E, D48E) can be provided upon reasonable request.

283

#### 284 *Secondary structure of the SARS-CoV-2 nsp1 protein*

285 The full length SARS-CoV-2 nsp1 protein chemical shifts were analyzed with TALOS+ (41),  
286 and the data are presented in Figs.3b and c. The analysis of the secondary structures of the folded  
287 domain of the SARS-CoV-2 nsp1, which was derived from the NMR data, and the previously  
288 determined crystal structure (7K7P) shows that they are almost identical, and this has validated our  
289 resonance assignment (Fig.3b and a). Nevertheless, a few important inconsistencies were identified.  
290 The crystal structure of SARS-CoV-2 nsp1 folded domain (28-30) revealed the presence of an  
291 additional short  $\beta$ 5-strand (aa 95-97), which is not found in the structure of SARS-CoV nsp1  
292 determined by NMR (PDB: 2HSX). In our study of the full-length nsp1, the presence of  $\beta$ 5-strand  
293 folded between aa 95 and 97 could not be confirmed. Moreover, according to the predicted order  
294 parameter [ $S^2$  by TALOS+ (Fig. 3C)], the segment between aa 92-103 is dynamic. This prediction is  
295 in agreement with our finding that amide protons between residues I95 and G98 were not observed at  
296 308K and 298K, suggesting their involvement in multiple conformational exchange and exposure to  
297 the solvent. We additionally performed an analysis of the 3D  $^1\text{H}$ - $^{15}\text{N}$  NOESY spectrum to determine  
298 dipole-dipole contacts of NH-NH and NH- $\text{H}^\alpha$  protons, which allows to detect hydrogen bonds between  
299 two  $\beta$ -strands (44). The  $\beta$ -sheet formed by strands  $\beta$ 4 and  $\beta$ 3, according to the X-ray structure, was  
300 confirmed by observing NH-NH and NH- $\text{H}^\alpha$  NOEs between those strands, but not between the  $\beta$ 4 and  
301  $\beta$ 5 strands. These data contradict the X-ray results, which suggest low mobility of the  $\beta$ 5 strand due to  
302 the additional hydrogen bonds between the  $\beta$ 4 and  $\beta$ 5 strands.

303

304 Subtle differences between the X-ray and NMR secondary structures were also noticed for the  
305 strands  $\beta$ 1,  $\beta$ 2,  $\beta$ 6 and  $\beta$ 7. According to our NMR data, in solution, these strands are extended by one  
306 or two aa at their C-termini. Furthermore, the  $\alpha$ -helix 2 in solution is one aa shorter than in the X-ray  
307 structure. Our data also predicted that the  $\alpha$ -helix has a break at aa H45. Another difference is that the  
308 previously identified short  $\alpha$ -helix 3 is not predicted by the NMR data. Instead, it suggests the presence  
309 of a long, disordered loop between aa 55 and 67, which, according to TALOS+ prediction, has  
310 restricted mobility (Fig.3b, c). Importantly, this region of SARS-CoV-2 nsp1 sequence is well  
311 characterized by NMR through CS as well as NOE of NH-NH, NH - NH- $H^\alpha$  protons contacts. This led  
312 us to conclusion that these discrepancies between NMR and X-ray secondary structure predictions are  
313 likely result from the crystallisation conditions.

314 Two loop regions in the folded domain of SARS-CoV-2, (aa Q27-S34 and G112-A117) are  
315 in agreement with the X-ray structure and have restricted mobility according to the higher order  $S^2$   
316 parameter predicted by TALOS+ (Fig 3c).

317 Two more dynamic regions in the solution structure of the folded domain of SARS-CoV-2  
318 were identified based on the  $S^2$  order parameter predicted by TALOS+: S74-H83 and L92-E102 (Fig  
319 3 b, c). This prediction is in line with the lack of peaks or broadened  $^{15}\text{N}/^{1}\text{HN}$  cross peaks, even at  
320 T298K in the  $^1\text{H}-^{15}\text{N}$  NMR spectra. We did not observe resonances for H81 and G82 in the first region  
321 and for S100 and G101 in the second one. It can be explained either by broadening of the cross peaks  
322 below detection limit or, which is more likely, by the involvement of these regions in slow  
323 conformational exchange.

324 The N- and C-termini, comprising aa M1-N9 and N124-G180, respectively, were identified  
325 by CSI as fully unstructured, but having different predicted order parameters ( $S^2$ ) through the  
326 sequences. Dynamic regions with an order parameter  $S^2$  below 0.6 were predicted for M1-F8, S135-  
327 Q158 and H165-G180. The increase in dynamic behaviour of those aa correlated with the changes in  
328 the intensities of the  $^{15}\text{N}/^{1}\text{HN}$  backbone cross peaks in the  $^1\text{H}-^{15}\text{N}$  NMR spectra of nsp1. These cross

329 peaks have higher intensity compared to cross peaks belonging to the folded less dynamic aa. Based  
330 on these data, we propose that in the full-length SARS-CoV-2 nsp1, the folded and disordered parts of  
331 the protein behave not as fully independent units but are rather involved in intramolecular interactions.

332

333 In conclusion, the near complete  $^{15}\text{N}/^{13}\text{C}/^1\text{H}$  backbone resonance and part of side chain  
334 assignment of the full-length SARS-CoV-2 nsp1 at pH 7.5 and physiological salt concentration has  
335 been performed. Validation of assignment have been done by using two different nsp1 mutants as well  
336 as MUSIC type experiments. Assignment revealed that the secondary structure of the rigid folded  
337 domain is almost identical to that determined by X-ray. However, the existence of the short  $\beta$ -strand  
338 (aa 95 to 97), which is considered to be the significant structural difference between SARS-CoV-1 and  
339 SARS-CoV-2 nsp1 proteins, was not confirmed. In solution, SARS-CoV-2 nsp1 exhibits disordered,  
340 flexible N- and C-termini, having different dynamics. The short peptide in the beginning of the C-  
341 terminal disordered fragment adopts two conformations. We propose that there are intramolecular  
342 interactions between the disordered and folded nsp1 domains. Studies of the structure and dynamics of  
343 the SARS-CoV-2 mutant in solution are on-going and will provide important insights on the molecular  
344 bases underlying these interactions.

#### 345 **Acknowledgment**

346

347 This work was supported by Swedish Foundation for Strategic Research grant  
348 ITM17-0218 to P.A., Public Health Service grant R21AI146969 to I.F. and UAB Research  
349 Acceleration Funds to E.F. and I.F. We thank Nikita Shiliaev for technical assistance.

#### 350 **Conflicts of interest**

351 The authors have no conflict of interest to declare.

352

#### 353 **References**



- 354 1. Zhu N, Zhang D, Wang W, Li X, Yang B, Song J, et al. A Novel Coronavirus from Patients with  
355 Pneumonia in China, 2019. *N Engl J Med.* 2020;382(8):727-33.
- 356 2. Perlman S. Another Decade, Another Coronavirus. *N Engl J Med.* 2020;382(8):760-2.
- 357 3. V'Kovski P, Kratzel A, Steiner S, Stalder H, Thiel V. Coronavirus biology and replication:  
358 implications for SARS-CoV-2. *Nat Rev Microbiol.* 2021;19(3):155-70.
- 359 4. Sola I, Almazan F, Zuniga S, Enjuanes L. Continuous and Discontinuous RNA Synthesis in  
360 Coronaviruses. *Annu Rev Virol.* 2015;2(1):265-88.
- 361 5. Enjuanes L, Almazan F, Sola I, Zuniga S. Biochemical aspects of coronavirus replication and virus-  
362 host interaction. *Annu Rev Microbiol.* 2006;60:211-30.
- 363 6. Nakagawa K, Makino S. Mechanisms of Coronavirus Nsp1-Mediated Control of Host and Viral  
364 Gene Expression. *Cells.* 2021;10(2).
- 365 7. Thoms M, Buschauer R, Ameismeier M, Koepke L, Denk T, Hirschenberger M, et al. Structural basis  
366 for translational shutdown and immune evasion by the Nsp1 protein of SARS-CoV-2. *Science.*  
367 2020;369(6508):1249-55.
- 368 8. Schubert K, Karousis ED, Jomaa A, Scaiola A, Echeverria B, Gurzeler LA, et al. SARS-CoV-2 Nsp1  
369 binds the ribosomal mRNA channel to inhibit translation. *Nat Struct Mol Biol.* 2020;27(10):959-66.
- 370 9. Wathelet MG, Orr M, Frieman MB, Baric RS. Severe acute respiratory syndrome coronavirus  
371 evades antiviral signaling: role of nsp1 and rational design of an attenuated strain. *J Virol.* 2007;81(21):11620-  
372 33.
- 373 10. Zust R, Cervantes-Barragan L, Kuri T, Blakqori G, Weber F, Ludewig B, et al. Coronavirus non-  
374 structural protein 1 is a major pathogenicity factor: implications for the rational design of coronavirus vaccines.  
375 *PLoS Pathog.* 2007;3(8):e109.
- 376 11. Lapointe CP, Grosely R, Johnson AG, Wang J, Fernandez IS, Puglisi JD. Dynamic competition  
377 between SARS-CoV-2 NSP1 and mRNA on the human ribosome inhibits translation initiation. *Proc Natl Acad Sci*  
378 *U S A.* 2021;118(6).
- 379 12. Tidu A, Janvier A, Schaeffer L, Sosnowski P, Kuhn L, Hammann P, et al. The viral protein NSP1 acts  
380 as a ribosome gatekeeper for shutting down host translation and fostering SARS-CoV-2 translation. *RNA.* 2020.
- 381 13. Tanaka T, Kamitani W, DeDiego ML, Enjuanes L, Matsuura Y. Severe acute respiratory syndrome  
382 coronavirus nsp1 facilitates efficient propagation in cells through a specific translational shutoff of host mRNA.  
383 *J Virol.* 2012;86(20):11128-37.
- 384 14. Kamitani W, Huang C, Narayanan K, Lokugamage KG, Makino S. A two-pronged strategy to  
385 suppress host protein synthesis by SARS coronavirus Nsp1 protein. *Nat Struct Mol Biol.* 2009;16(11):1134-40.
- 386 15. Lokugamage KG, Narayanan K, Huang C, Makino S. Severe acute respiratory syndrome  
387 coronavirus protein nsp1 is a novel eukaryotic translation inhibitor that represses multiple steps of translation  
388 initiation. *J Virol.* 2012;86(24):13598-608.
- 389 16. Huang C, Lokugamage KG, Rozovics JM, Narayanan K, Semler BL, Makino S. SARS coronavirus nsp1  
390 protein induces template-dependent endonucleolytic cleavage of mRNAs: viral mRNAs are resistant to nsp1-  
391 induced RNA cleavage. *PLoS Pathog.* 2011;7(12):e1002433.
- 392 17. Yuan S, Peng L, Park JJ, Hu Y, Devarkar SC, Dong MB, et al. Nonstructural Protein 1 of SARS-CoV-2  
393 Is a Potent Pathogenicity Factor Redirecting Host Protein Synthesis Machinery toward Viral RNA. *Mol Cell.*  
394 2020;80(6):1055-66 e6.
- 395 18. Nakagawa K, Narayanan K, Wada M, Popov VL, Cajimat M, Baric RS, et al. The Endonucleolytic  
396 RNA Cleavage Function of nsp1 of Middle East Respiratory Syndrome Coronavirus Promotes the Production of  
397 Infectious Virus Particles in Specific Human Cell Lines. *J Virol.* 2018;92(21).

- 398 19. Kamitani W, Narayanan K, Huang C, Lokugamage K, Ikegami T, Ito N, et al. Severe acute respiratory  
399 syndrome coronavirus nsp1 protein suppresses host gene expression by promoting host mRNA degradation.  
400 Proc Natl Acad Sci U S A. 2006;103(34):12885-90.
- 401 20. Gomez GN, Abrar F, Dodhia MP, Gonzalez FG, Nag A. SARS coronavirus protein nsp1 disrupts  
402 localization of Nup93 from the nuclear pore complex. Biochem Cell Biol. 2019;97(6):758-66.
- 403 21. Zhang K, Miorin L, Makio T, Dehghan I, Gao S, Xie Y, et al. Nsp1 protein of SARS-CoV-2 disrupts  
404 the mRNA export machinery to inhibit host gene expression. Sci Adv. 2021;7(6).
- 405 22. Shen Z, Zhang G, Yang Y, Li M, Yang S, Peng G. Lysine 164 is critical for SARS-CoV-2 Nsp1 inhibition  
406 of host gene expression. J Gen Virol. 2021;102(1).
- 407 23. Brockway SM, Denison MR. Mutagenesis of the murine hepatitis virus nsp1-coding region  
408 identifies residues important for protein processing, viral RNA synthesis, and viral replication. Virology.  
409 2005;340(2):209-23.
- 410 24. Eckerle LD, Brockway SM, Sperry SM, Lu X, Denison MR. Effects of mutagenesis of murine  
411 hepatitis virus nsp1 and nsp14 on replication in culture. Adv Exp Med Biol. 2006;581:55-60.
- 412 25. Jimenez-Guardeno JM, Regla-Nava JA, Nieto-Torres JL, DeDiego ML, Castano-Rodriguez C,  
413 Fernandez-Delgado R, et al. Identification of the Mechanisms Causing Reversion to Virulence in an Attenuated  
414 SARS-CoV for the Design of a Genetically Stable Vaccine. PLoS Pathog. 2015;11(10):e1005215.
- 415 26. Lei L, Ying S, Baojun L, Yi Y, Xiang H, Wenli S, et al. Attenuation of mouse hepatitis virus by deletion  
416 of the LLRKxGxKG region of Nsp1. PLoS One. 2013;8(4):e61166.
- 417 27. Narayanan K, Huang C, Lokugamage K, Kamitani W, Ikegami T, Tseng CT, et al. Severe acute  
418 respiratory syndrome coronavirus nsp1 suppresses host gene expression, including that of type I interferon, in  
419 infected cells. J Virol. 2008;82(9):4471-9.
- 420 28. Almeida MS, Johnson MA, Herrmann T, Geralt M, Wuthrich K. Novel beta-barrel fold in the  
421 nuclear magnetic resonance structure of the replicase nonstructural protein 1 from the severe acute respiratory  
422 syndrome coronavirus. J Virol. 2007;81(7):3151-61.
- 423 29. Semper C, Stogios P, Meziame-Cherif D, Evdokimova E, Courvalin P, Savchenko A. Structural  
424 characterization of aminoglycoside 4'-O-adenylyltransferase ANT(4')-IIb from *Pseudomonas aeruginosa*. Protein  
425 Sci. 2020;29(3):758-67.
- 426 30. Semper C, Watanabe N, Savchenko A. Structural characterization of nonstructural protein 1 from  
427 SARS-CoV-2. iScience. 2021;24(1):101903.
- 428 31. Wang Y, Kirkpatrick J, Zur Lage S, Korn SM, Neissner K, Schwalbe H, et al. (1)H, (13)C, and (15)N  
429 backbone chemical-shift assignments of SARS-CoV-2 non-structural protein 1 (leader protein). Biomol NMR  
430 Assign. 2021.
- 431 32. Wishart DS, Bigam CG, Yao J, Abildgaard F, Dyson HJ, Oldfield E, et al. 1H, 13C and 15N chemical  
432 shift referencing in biomolecular NMR. J Biomol NMR. 1995;6(2):135-40.
- 433 33. Orekhov V, Jaravine VA. Analysis of non-uniformly sampled spectra with multi-dimensional  
434 decomposition. Progress in Nuclear Magnetic Resonance Spectroscopy. 2011;59:271-92.
- 435 34. Kay LE, Ikura M, Tschudin R, Bax A. 3-Dimensional Triple-Resonance Nmr-Spectroscopy of  
436 Isotopically Enriched Proteins. Journal of Magnetic Resonance. 1990;89(3):496-514.
- 437 35. Kay LE, Keifer P, Saarinen T. Pure Absorption Gradient Enhanced Heteronuclear Single Quantum  
438 Correlation Spectroscopy with Improved Sensitivity. J Am Chem Soc. 1992;114(26):10663-5.
- 439 36. Schleucher J, Schwendinger M, Sattler M, Schmidt P, Schedletsky O, Glaser SJ, et al. A general  
440 enhancement scheme in heteronuclear multidimensional NMR employing pulsed field gradients. J Biomol Nmr.  
441 1994;4(2):301-6.

- 442 37. Bermel W, Bertini I, Felli IC, Pierattelli R, Vasos PR. A selective experiment for the sequential  
443 protein backbone assignment from 3D heteronuclear spectra. *J Magn Reson.* 2005;172(2):324-8.
- 444 38. Bermel W, Bertini I, Duma L, Felli IC, Emsley L, Pierattelli R, et al. Complete assignment of  
445 heteronuclear protein resonances by protonless NMR spectroscopy. *Angew Chem Int Edit.* 2005;44(20):3089-  
446 92.
- 447 39. Agback P, Shernyukov A, Dominguez F, Agback T, Frolova EI. Novel NMR Assignment Strategy  
448 Reveals Structural Heterogeneity in Solution of the nsP3 HVD Domain of Venezuelan Equine Encephalitis Virus.  
449 *Molecules.* 2020;25(24).
- 450 40. Vranken WF, Boucher W, Stevens TJ, Fogh RH, Pajon A, Llinas M, et al. The CCPN data model for  
451 NMR spectroscopy: development of a software pipeline. *Proteins.* 2005;59(4):687-96.
- 452 41. Shen Y, Delaglio F, Cornilescu G, Bax A. TALOS+: a hybrid method for predicting protein backbone  
453 torsion angles from NMR chemical shifts. *J Biomol NMR.* 2009;44(4):213-23.
- 454 42. Pettersen EF, Goddard TD, Huang CC, Couch GS, Greenblatt DM, Meng EC, et al. UCSF chimera -  
455 A visualization system for exploratory research and analysis. *Journal of Computational Chemistry.*  
456 2004;25(13):1605-12.
- 457 43. Markley JL, Bax A, Arata Y, Hilbers CW, Kaptein R, Sykes BD, et al. Recommendations for the  
458 presentation of NMR structures of proteins and nucleic acids--IUPAC-IUBMB-IUPAB Inter-Union Task Group on  
459 the standardization of data bases of protein and nucleic acid structures determined by NMR spectroscopy. *Eur*  
460 *J Biochem.* 1998;256(1):1-15.
- 461 44. Wüthrich K. *NMR of proteins and nucleic acids.* New York: Wiley-Interscience; 1986.
- 462 45. Lipari G, Szabo A. Model-Free Approach to the Interpretation of Nuclear Magnetic-Resonance  
463 Relaxation in Macromolecules .1. Theory and Range of Validity. *J Am Chem Soc.* 1982;104(17):4546-59.
- 464 46. Berjanskii MV, Wishart DS. A simple method to predict protein flexibility using secondary chemical  
465 shifts. *J Am Chem Soc.* 2005;127(43):14970-1.
- 466

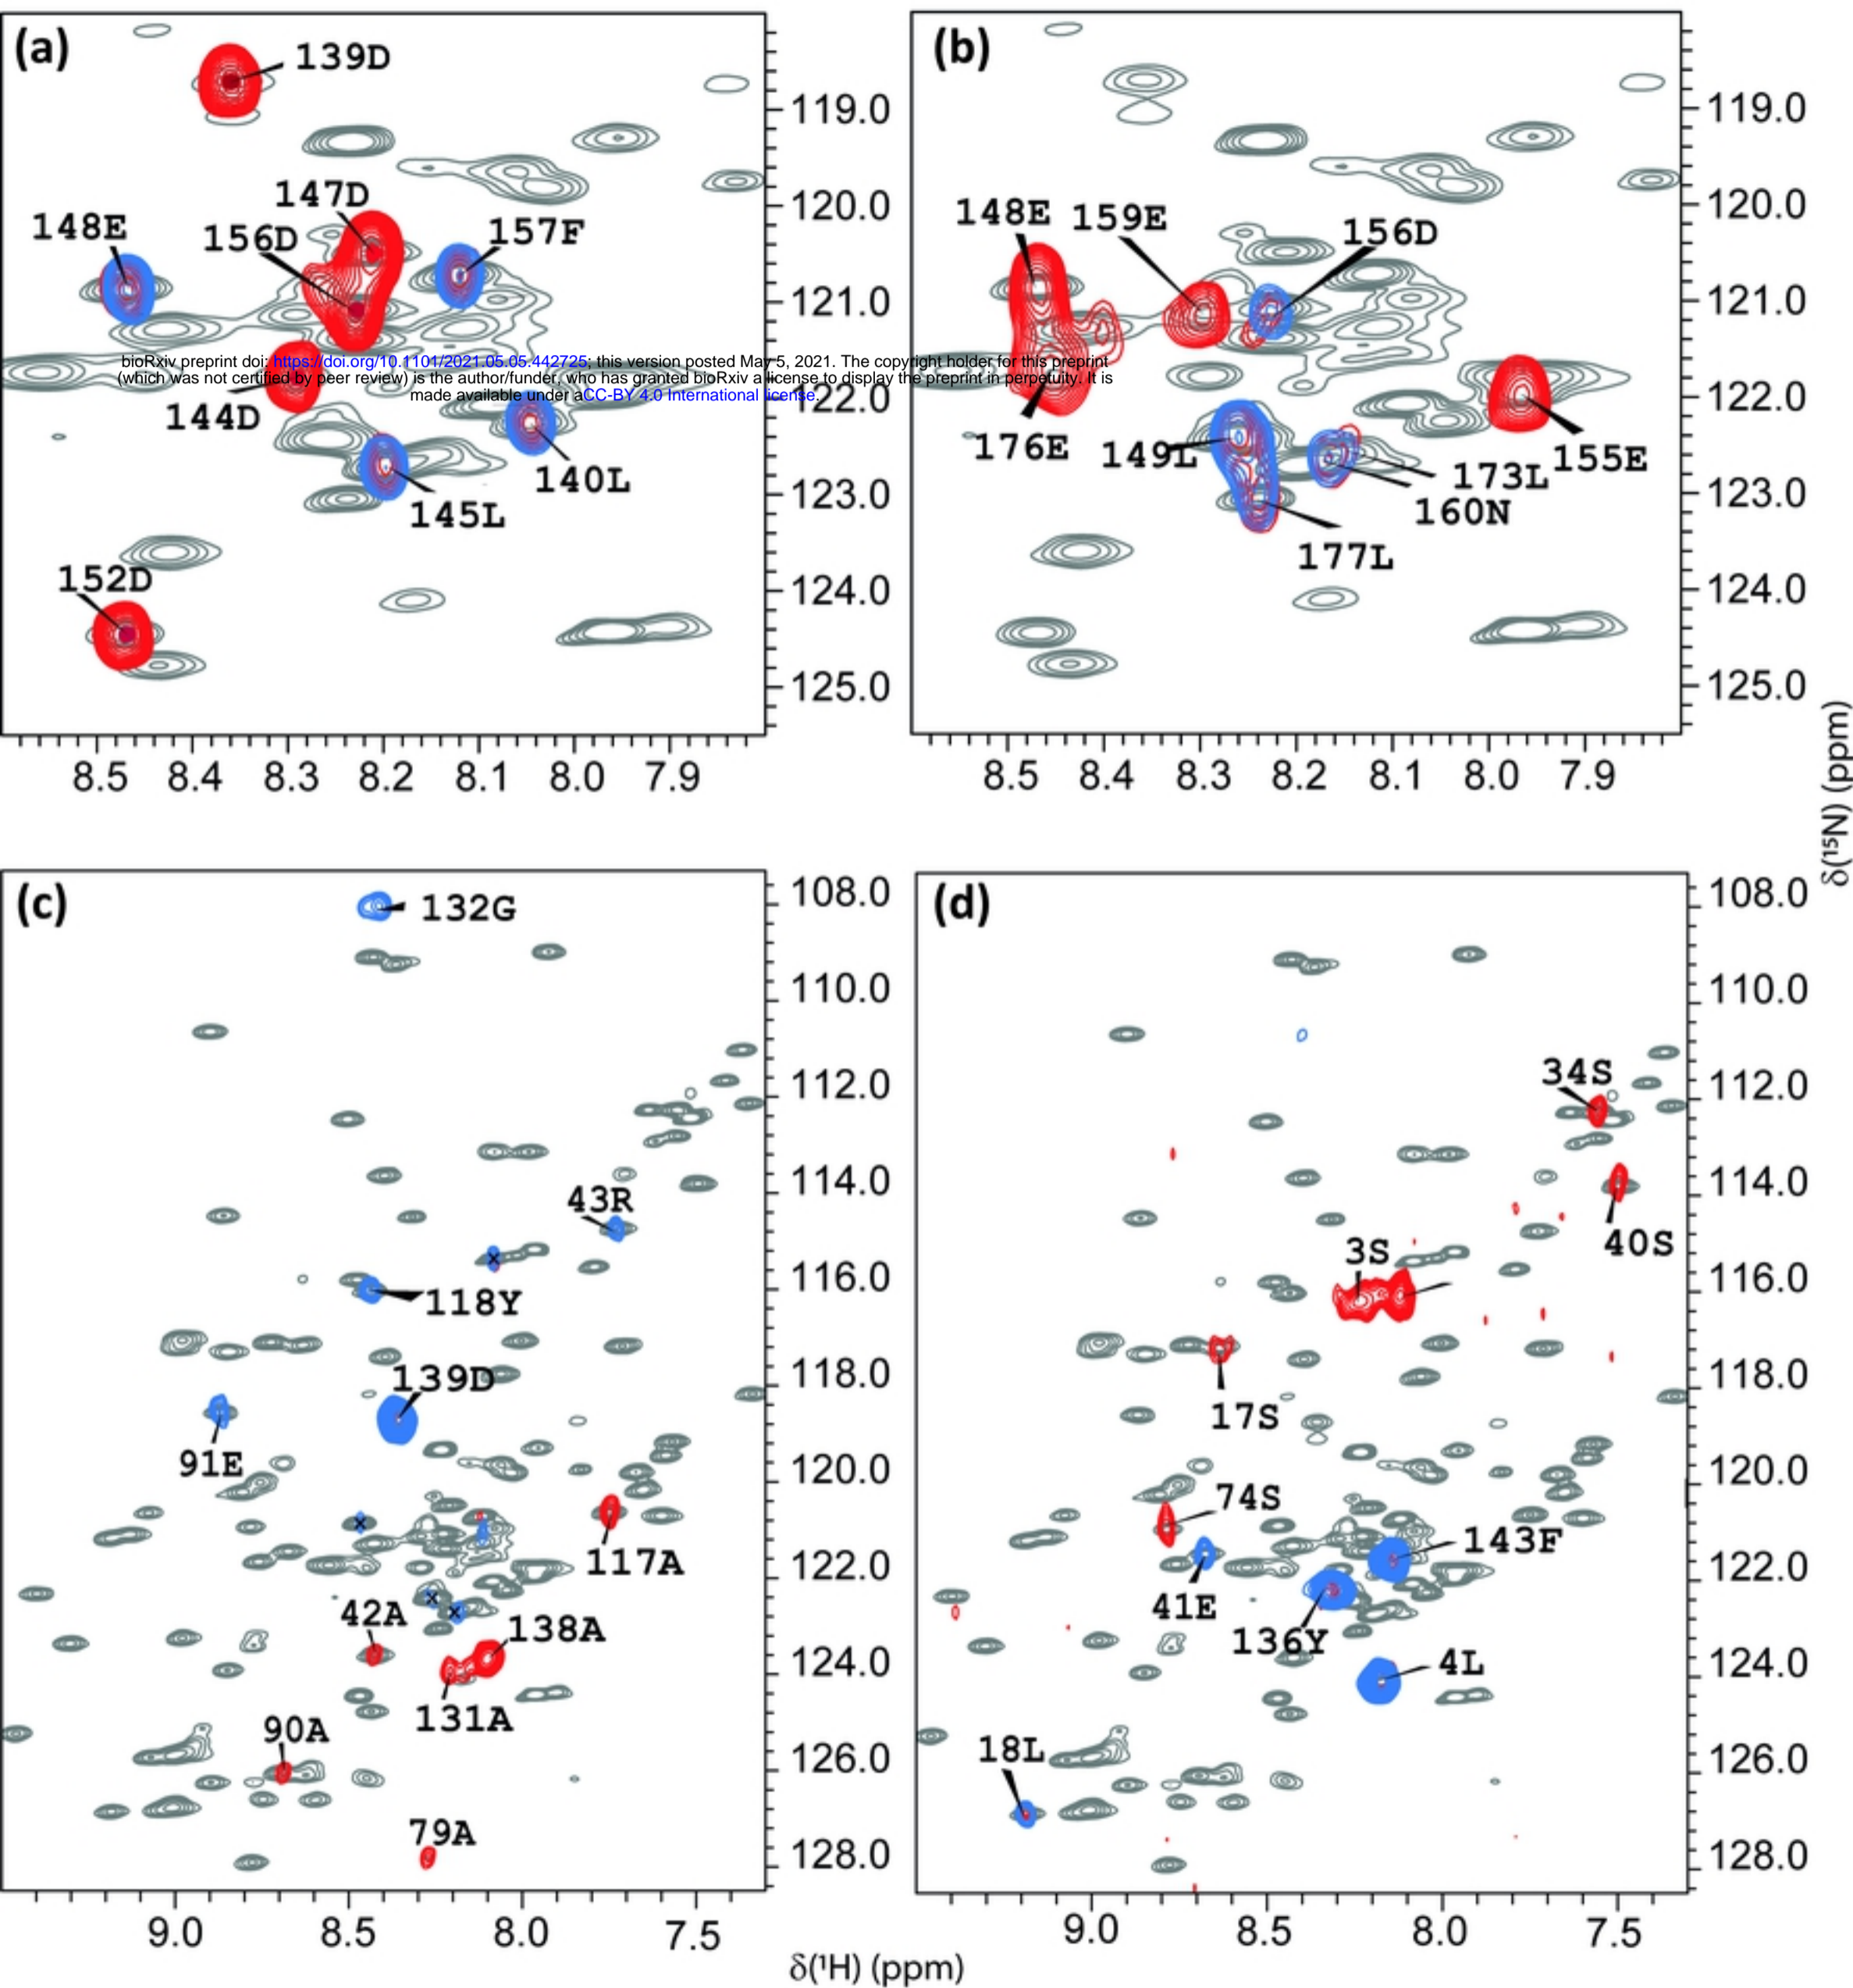

Figure 1

**(A)**

<sup>1</sup>MESLVPGFNE KTHVQLSLPV LQVRDVLVRG FGDSVEEVLS EARQHLKDGT CGLVEVEKGV  
 LPQLEQPYVF IKRSDARTAP HGHVMVELVA ELEGIQYGRS GETLGLVLPVH VGEIPVAYRK  
 VLLRKNGNKG AGGHSYGADL KSFDLGDELG TDPYEDFQFN WNTKHSSGVT RELMRELNGG<sup>180</sup>

**(B)**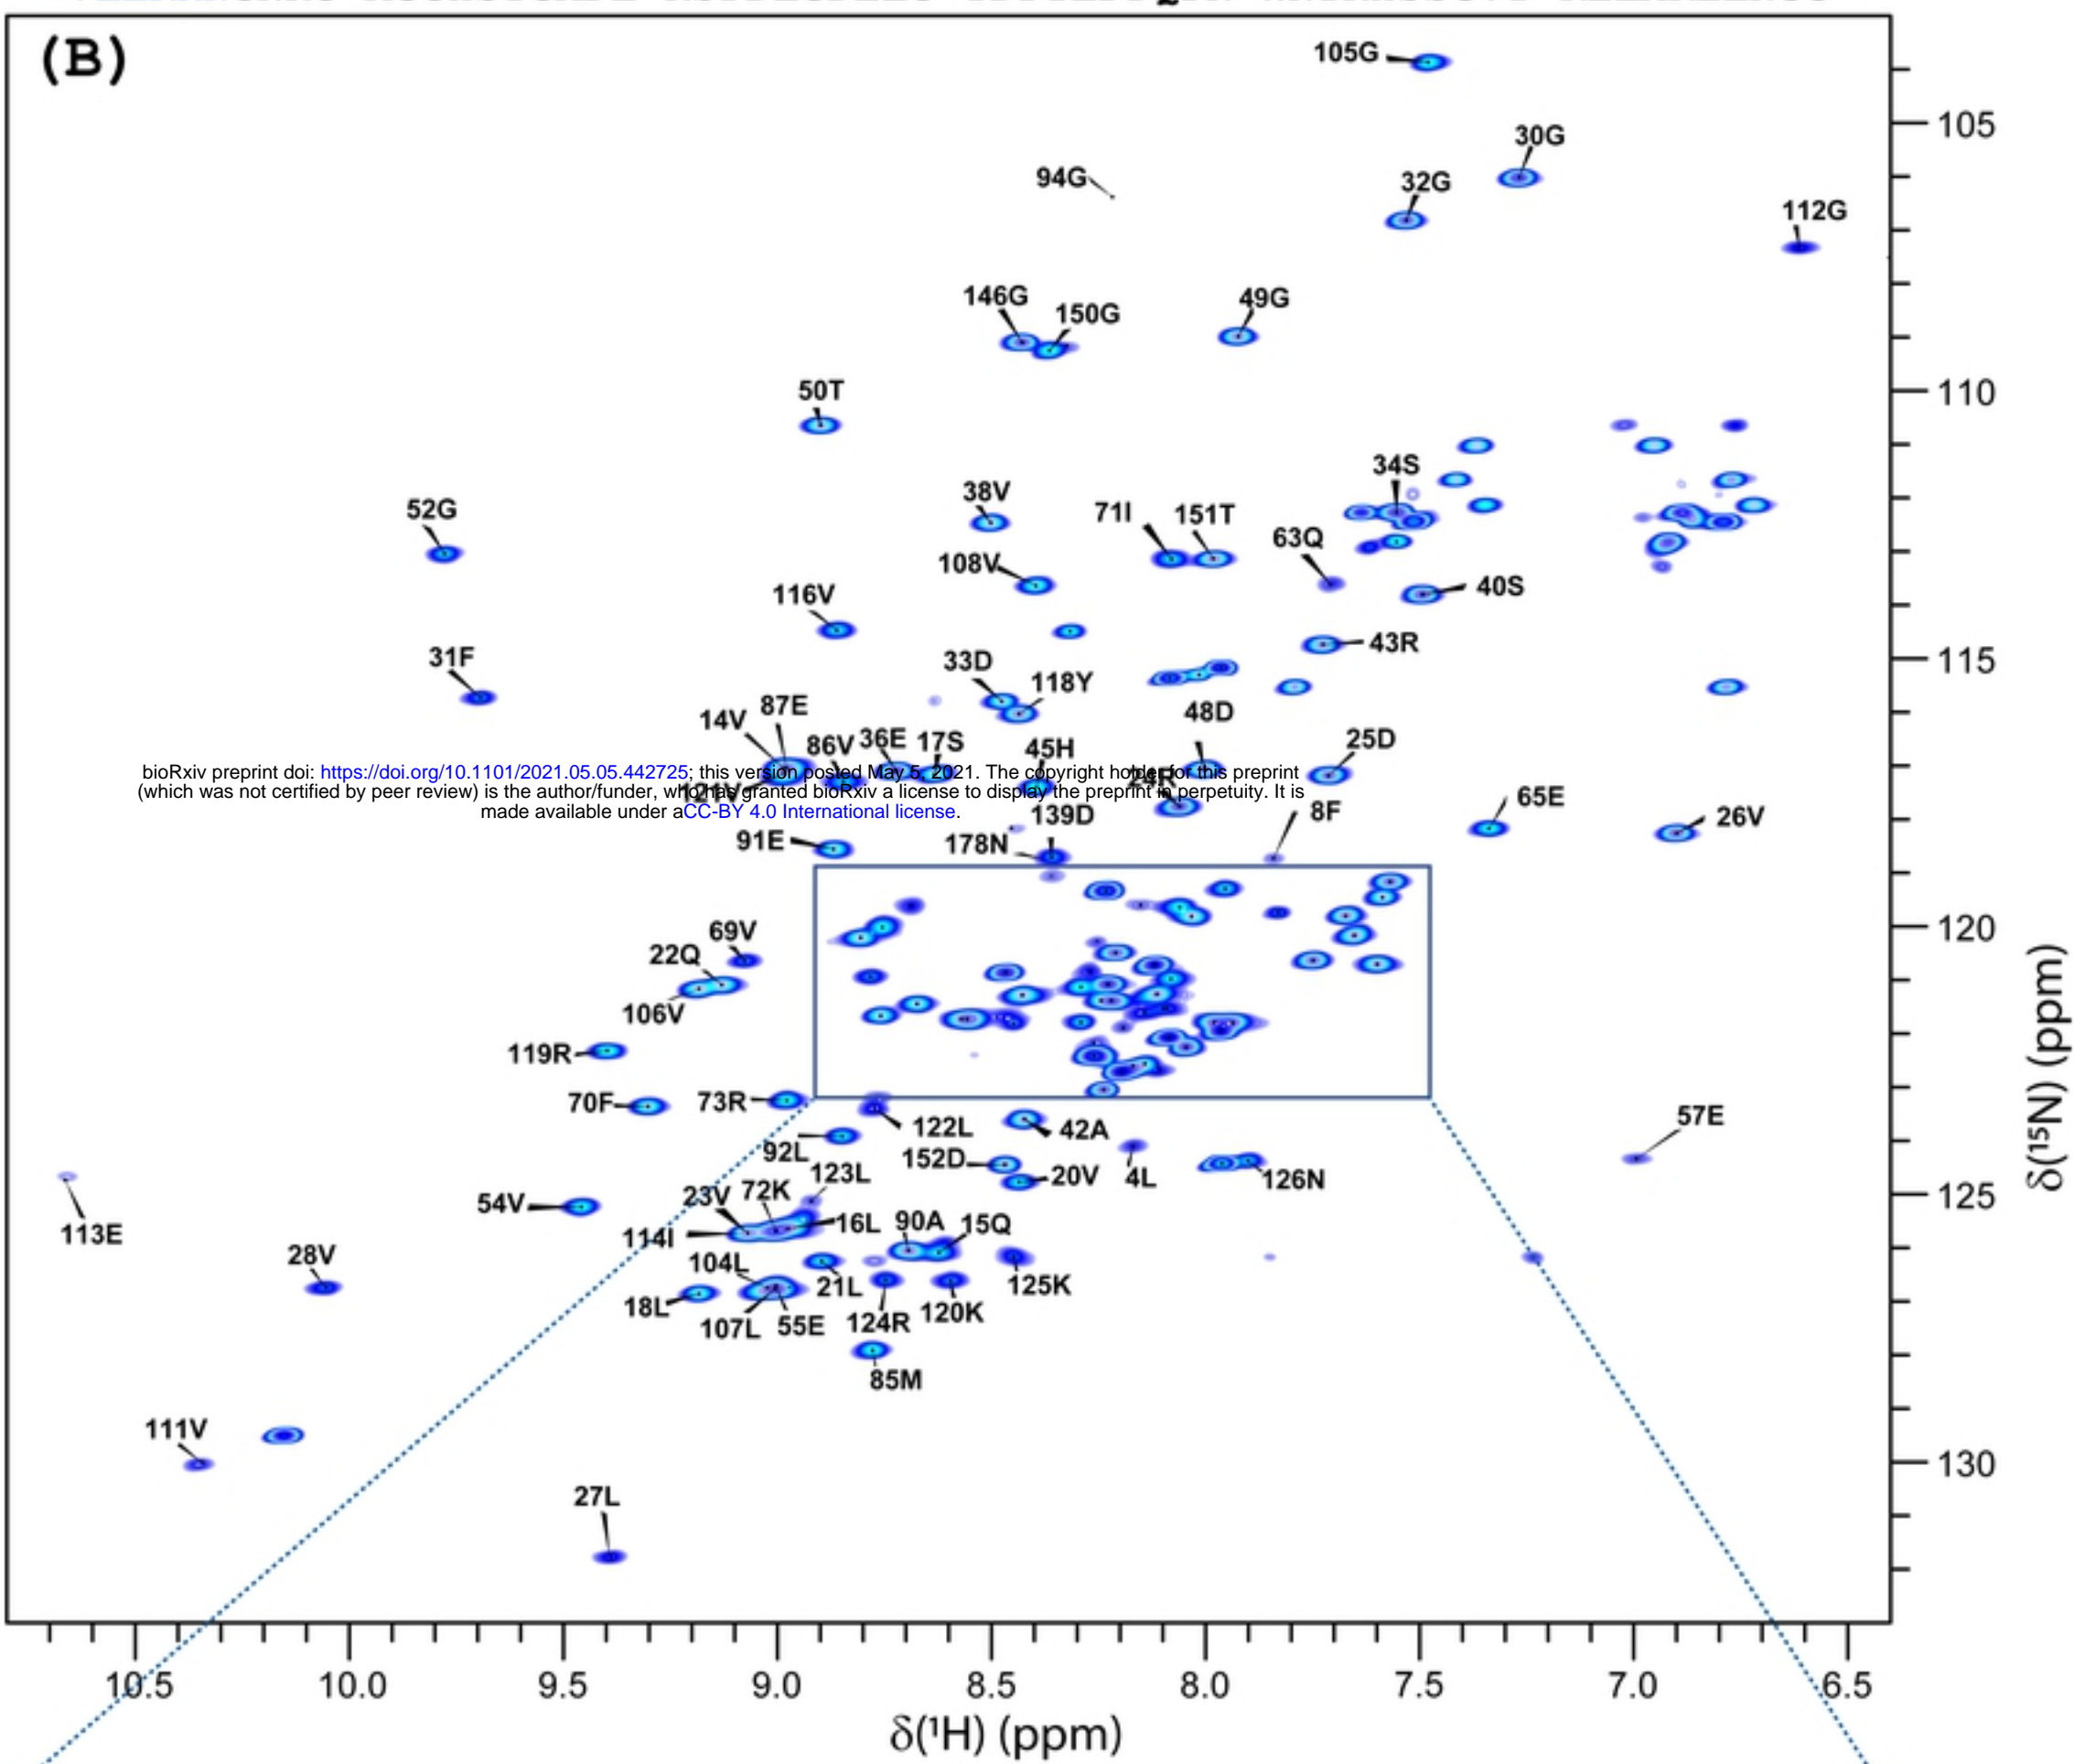**(C)**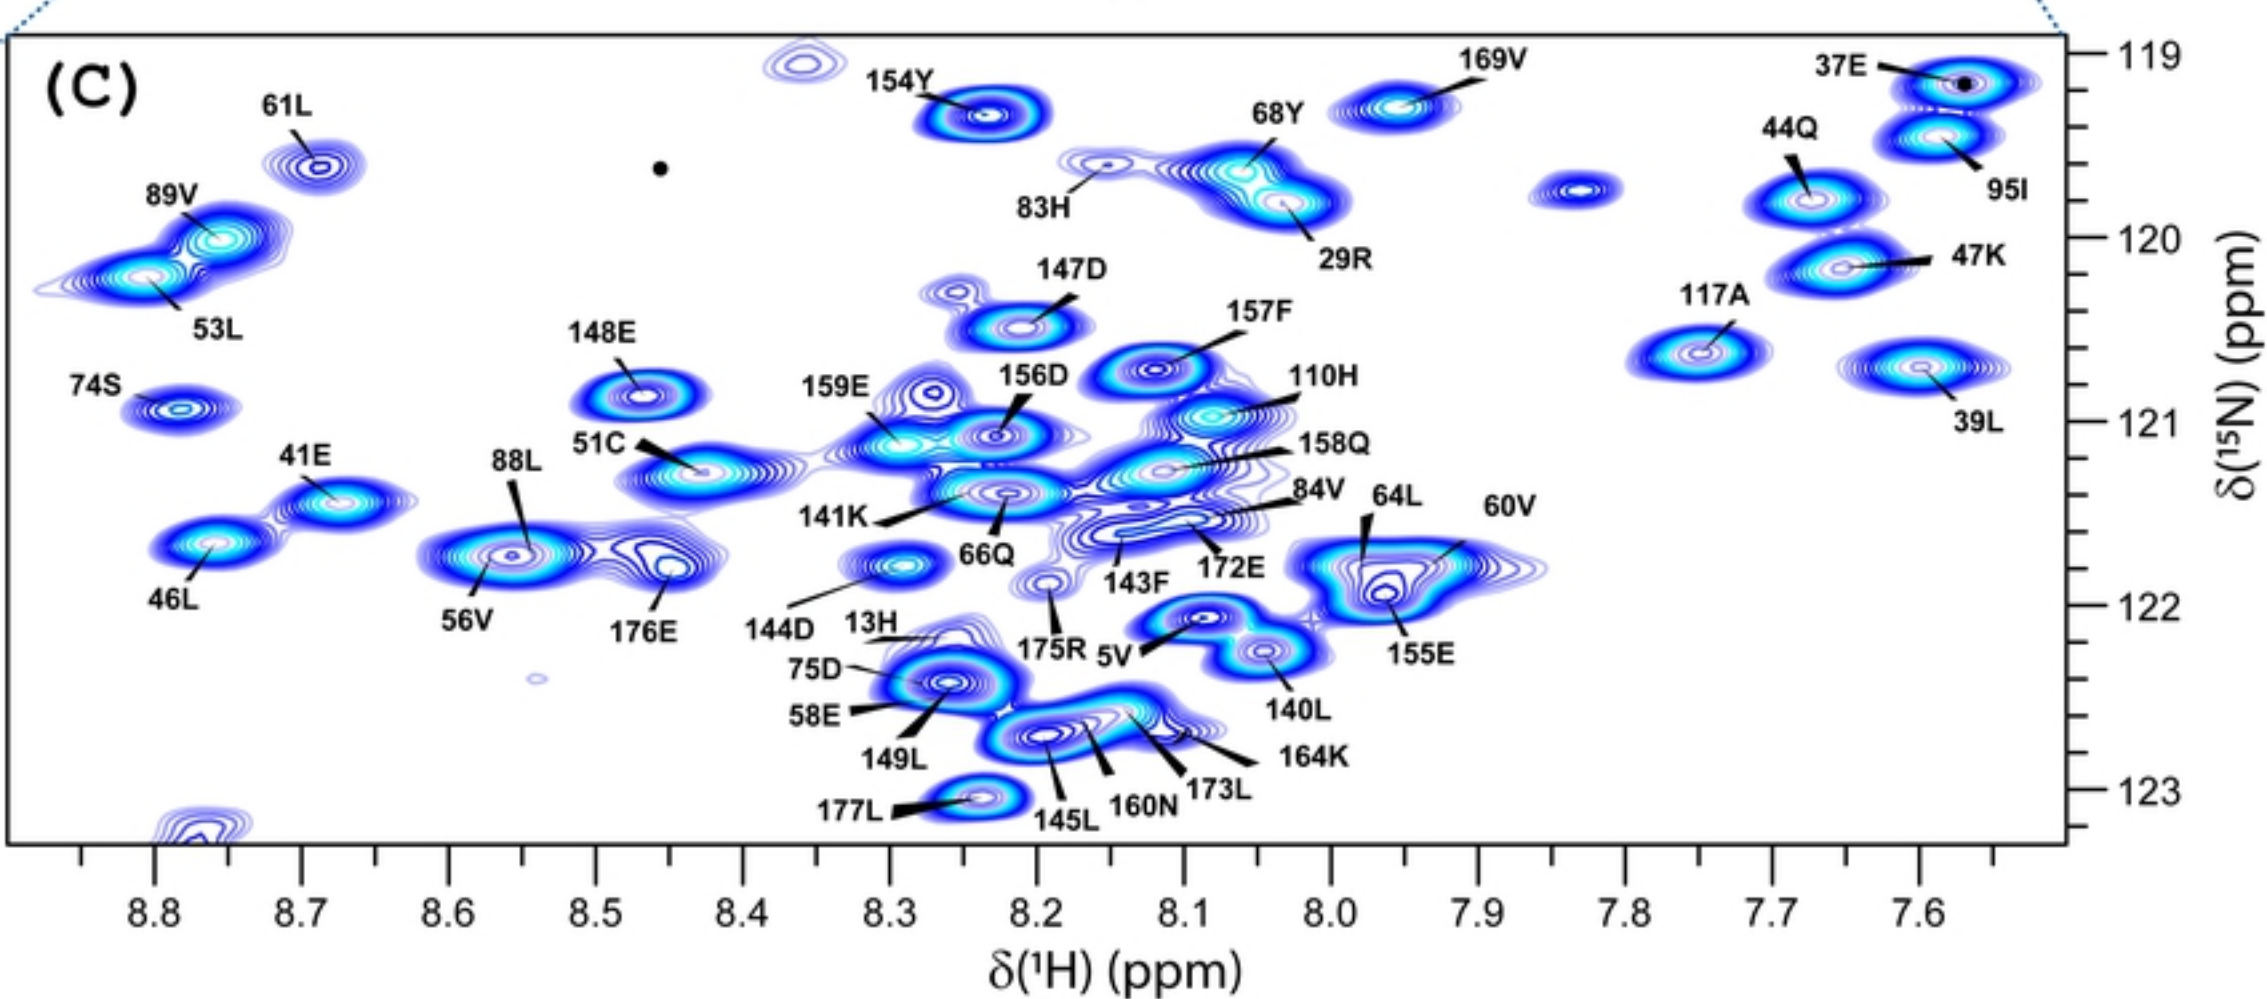

Figure2

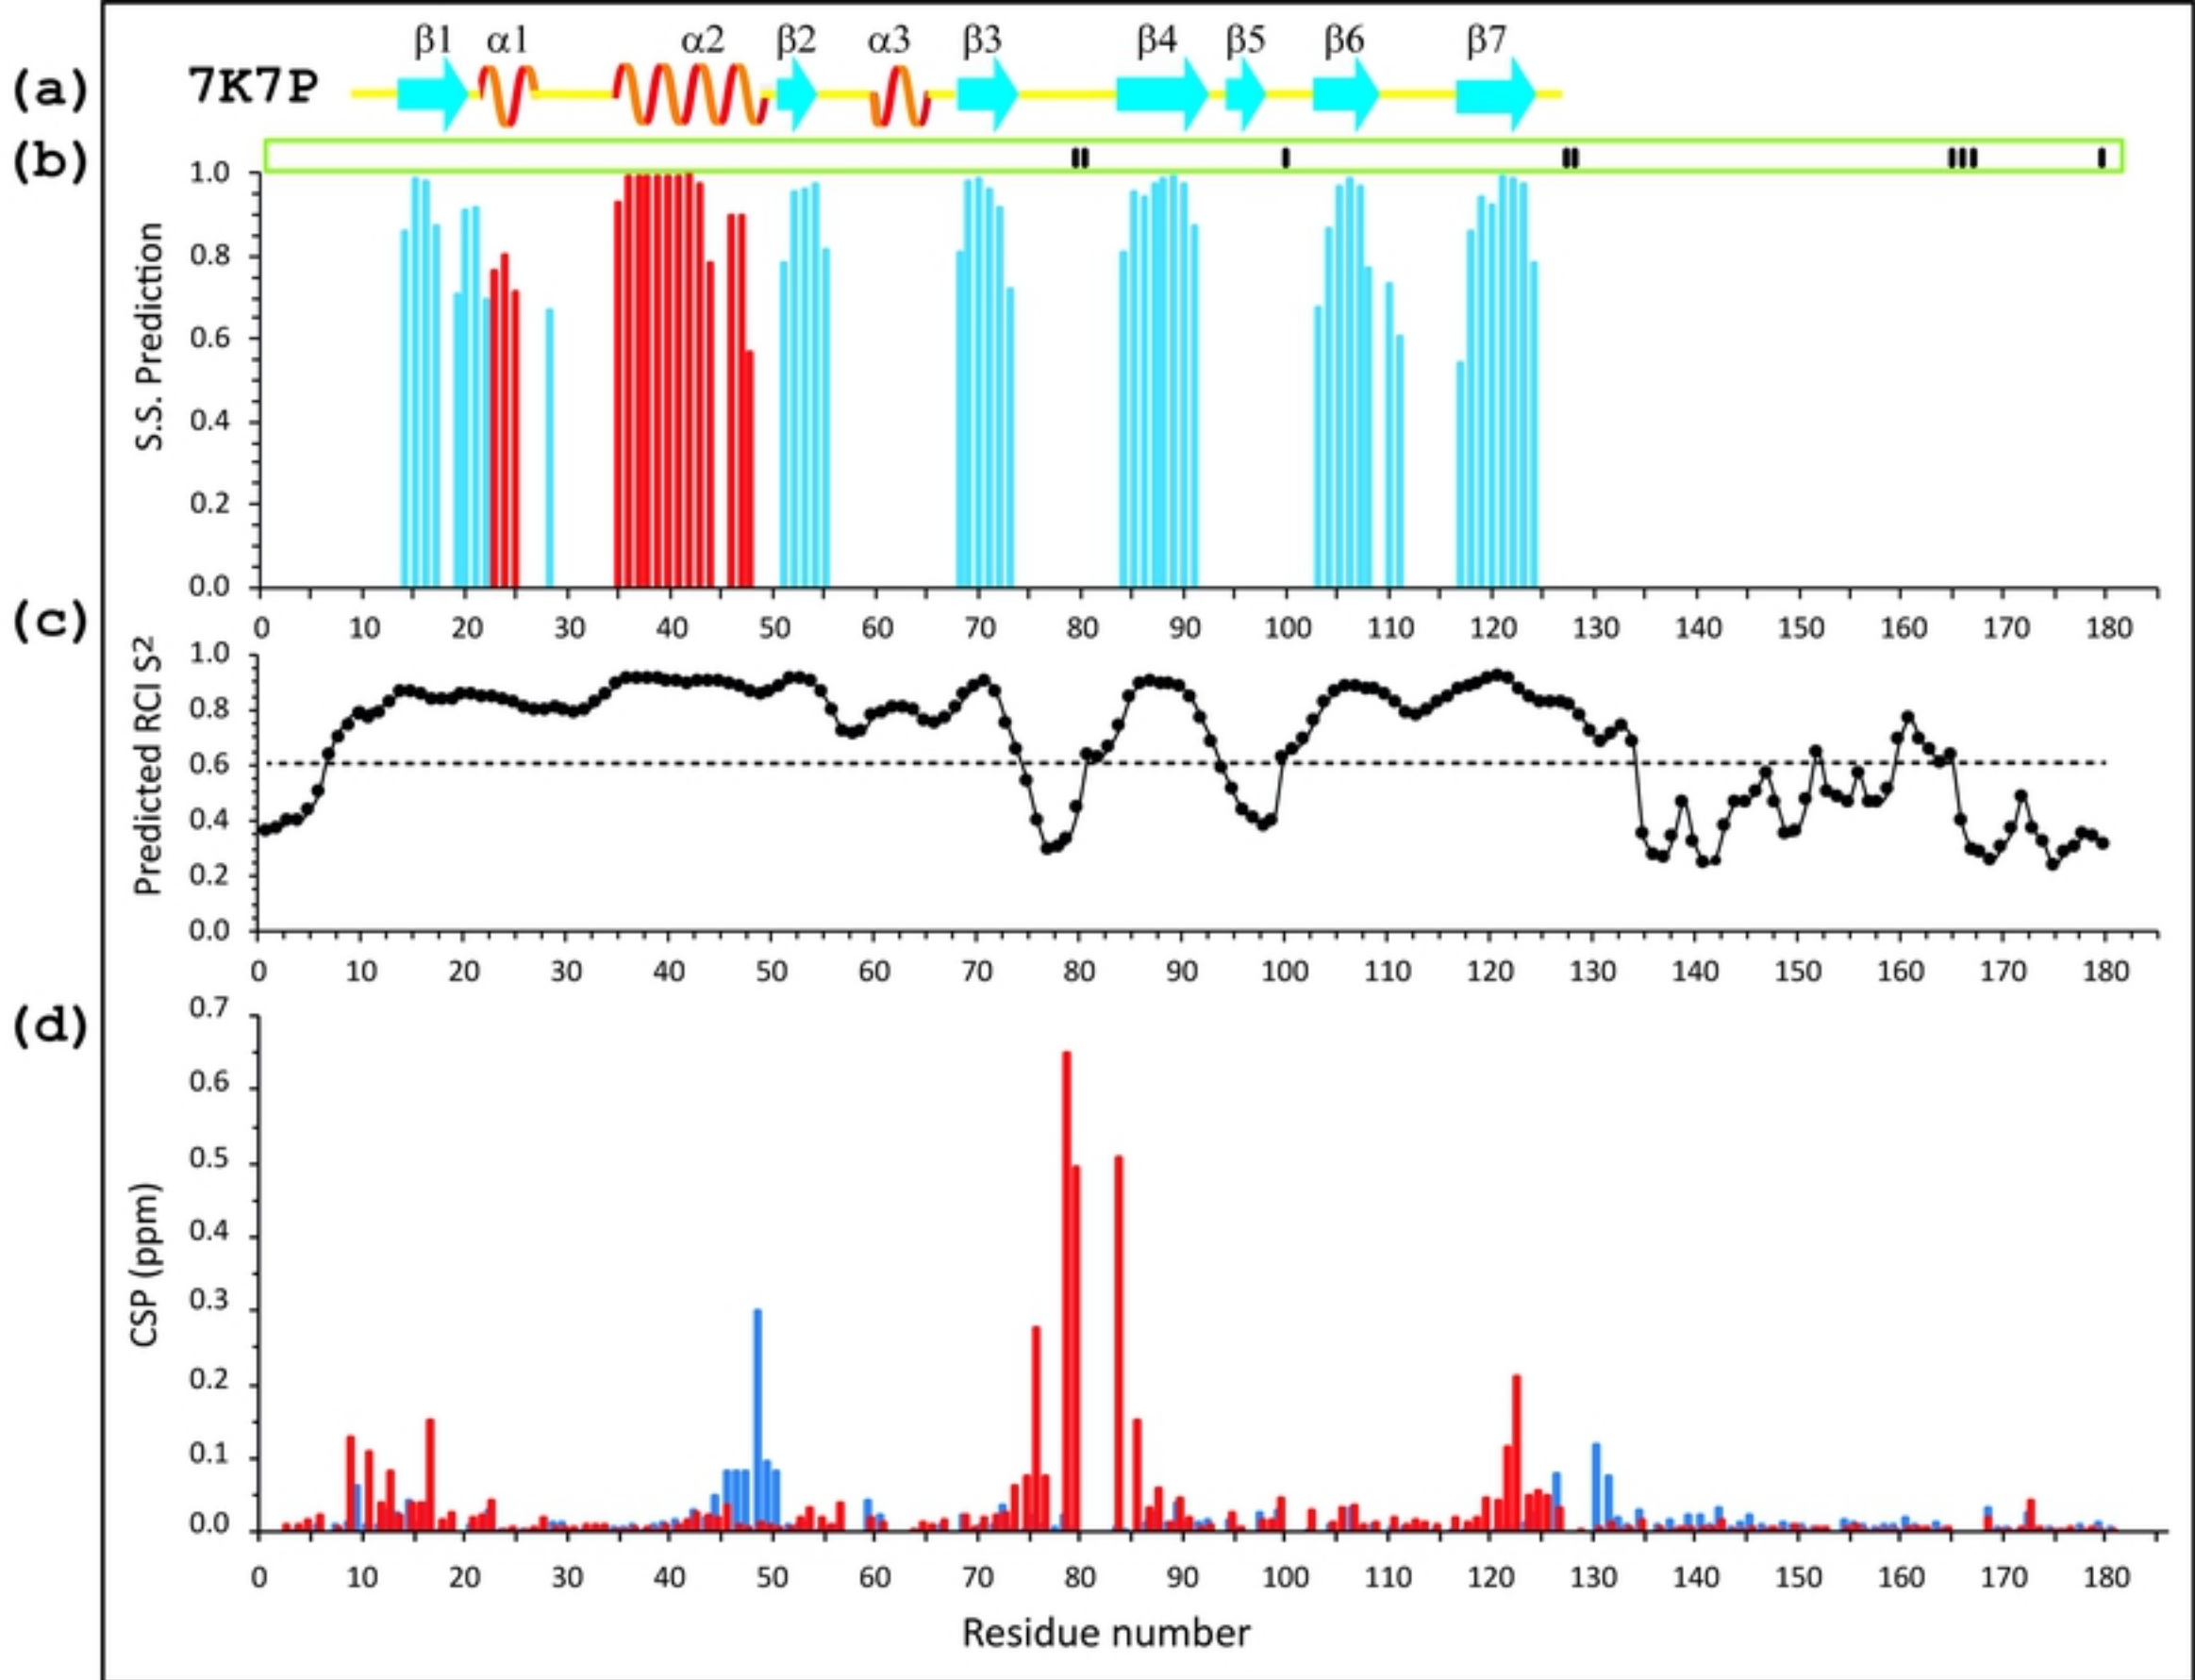

Figure3
